# Supplementary material for: Theoretical design and performance prediction of deep red/near-infrared thermally activated delayed fluorescence molecules with through space charge transfer
Source: Royal Society of Chemistry journal article supplement (doi:10.1039/d3cp05670h), 2024-01-01
Supplement: d3cp05670h1.pdf [file d3cp05670h1.pdf]

## Supporting information

# Theoretical Design and Performance Prediction of Deep- red/Near-infrared Thermally Activated Delayed Fluorescent Molecules with Through Space Charge Transfer

Xiaofang Li, Xiaofei Wang, Zhimin Wu, Kai Zhang, Rui Li, Yuzhi Song, Jianzhong Fan, Chuan-Kui Wang\*, Lili

Lin\*

Shandong Key Laboratory of Medical Physics and Image Processing & Shandong Provincial  
Engineering and Technical Center of Light Manipulations, School of Physics and Electronics,  
Shandong Normal University, Jinan 250358, China

\*Author to whom correspondence should be addressed.

E-mail: ckwang@sdu.edu.cn and linll@sdu.edu.cn

In order to analyze TSCT ratio quantitatively, the non-relaxation part of charge transfer should be determined by analyzing the hole-electron distribution for excited molecule. This CT ratio is analyzed by inter-fragment charge transfer (IFCT) method, achieved by following function:

$$Q_{R,S} = \Theta_{R,hole} \Theta_{S,ele}$$

Here  $Q_{R,S}$  means the charge transfer quantity,  $\Theta_{R,hole}$  is the excited electron occupied by part R,  $\Theta_{S,ele}$  represents the arrived electron occupied by part S, then pure amount of electron transfer can be calculated by following formula:

$$p_{S \rightarrow R} = Q_{S,R} - Q_{R,S}$$

$$\Delta p_R = \sum_{S \neq R} Q_{S,R} - Q_{R,S}$$

Where,  $p_{S \rightarrow R}$  represents the pure amount of electron transfer of two parts,  $\Delta p_R$  is the charge variation of one part. Based on these functions, the charge transfer ratio can be calculated quantitatively. Among these, the direct CT ratio between D-A can be regarded as through-space CT, the CT ratios of D- $\pi$  and  $\pi$ -A are regard as through-bond CT.

However, if there is no spatial overlap between holes and electrons in one molecule, the transition is forbidden although with large charge transfer. In other words, this part of charge transfer does not contribute to the absorption or emission. So, what we concerned about is that the CT transition which can contribute to emission and absorption. To solve this issue, we analyze the transition density by the following function:

$$\rho_{TB} = \rho_{tot} - \rho_{TS}$$

Here,  $\rho_{tot}$  means the transition density integral of the whole molecule, and  $\rho_{TS}$  represents the transition density integral of the molecule with deleted  $\pi$  bridge,  $\rho_{TB}$  is then obtained. Following the abovementioned method, we should define the donor part, acceptor part and bridge part.

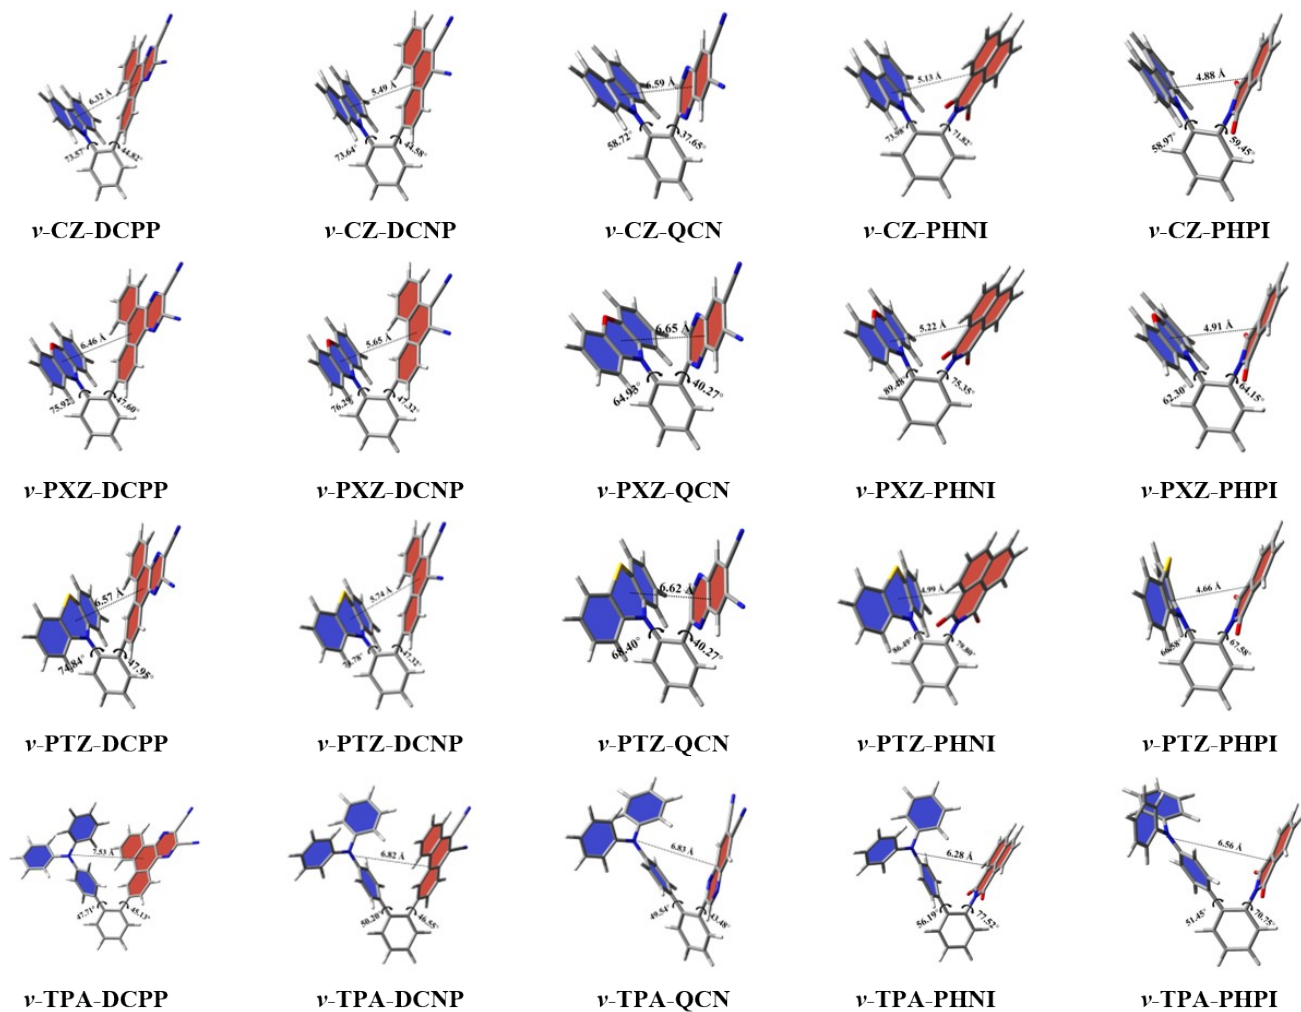

**Figure S1.** The geometric parameters of all  $\nu$ -shaped molecules in Toluene.

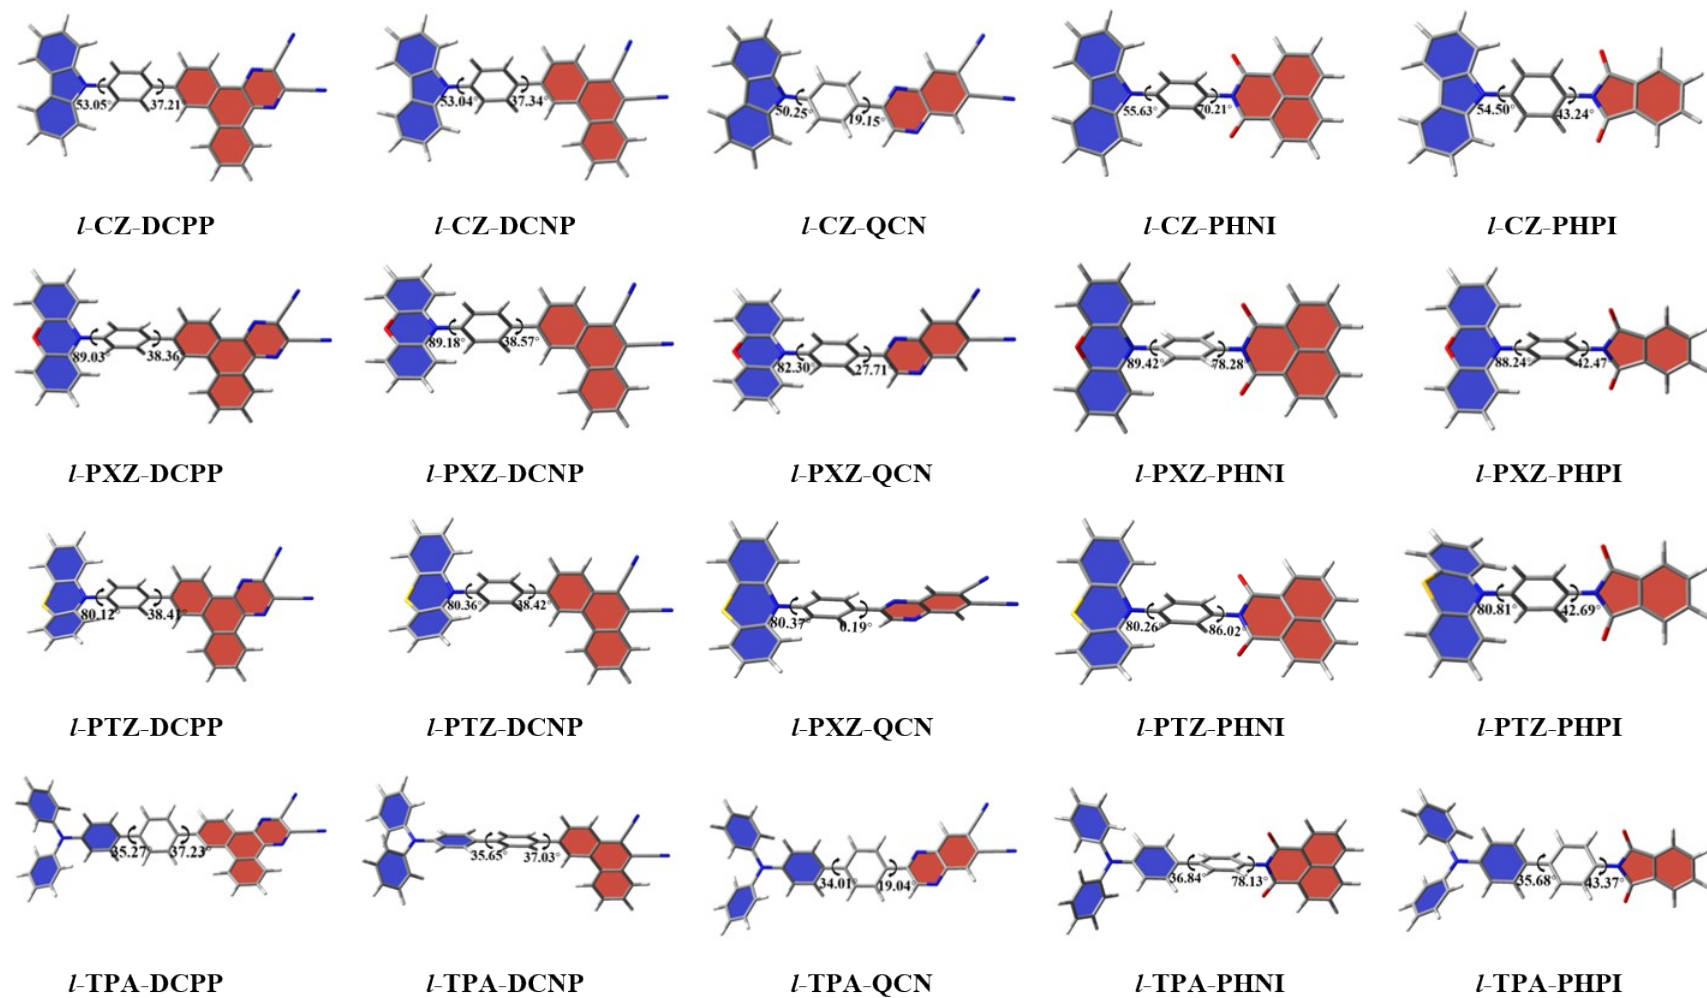

**Figure S2.** The geometric parameters of all *l*-shaped molecules in Toluene.

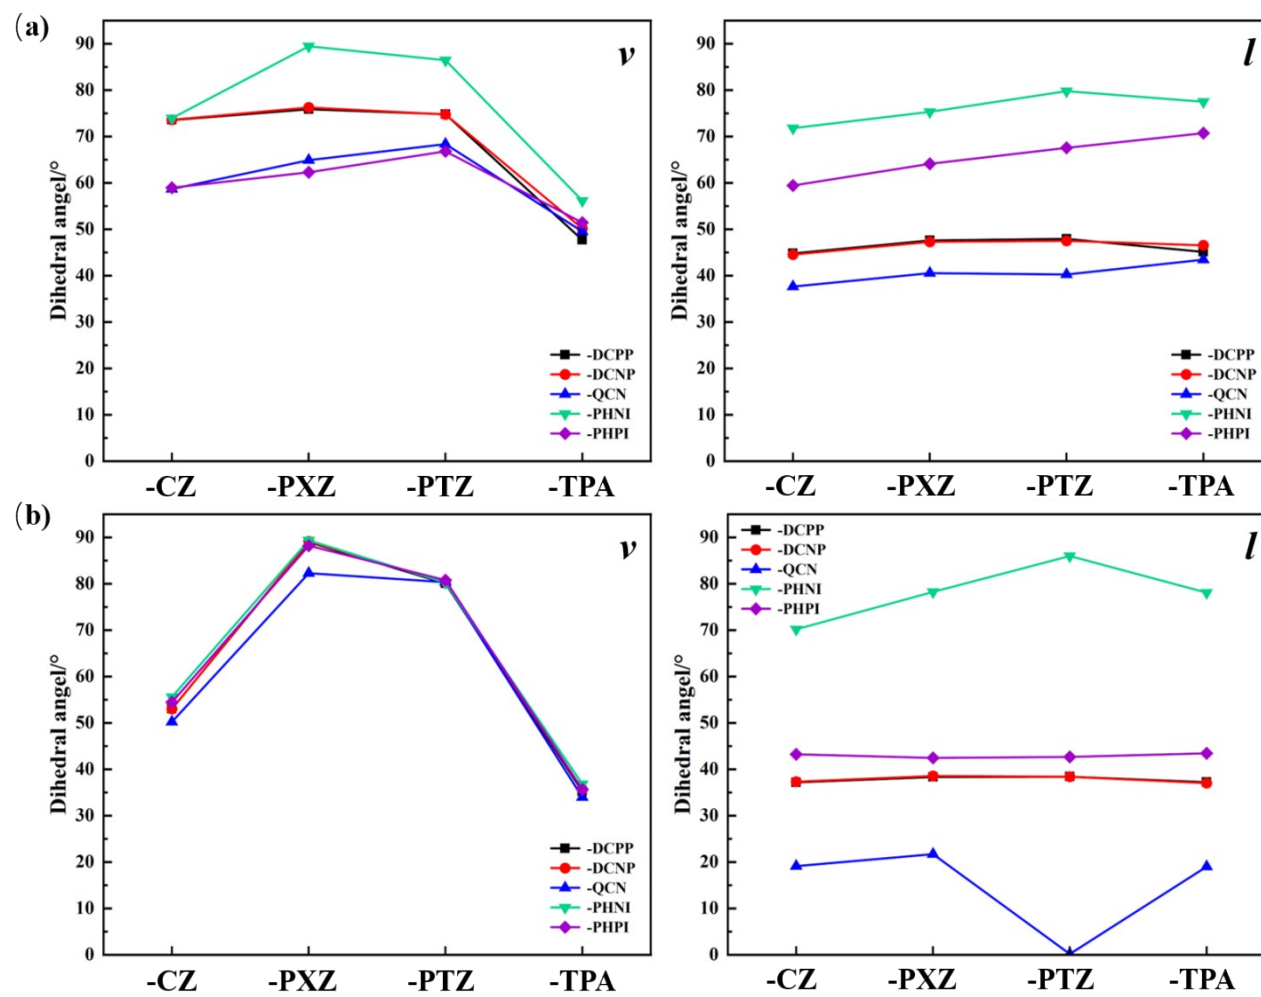

**Figure S3.** The dihedral angles of B and D (a), B and A (b) for all molecules in Toluene.

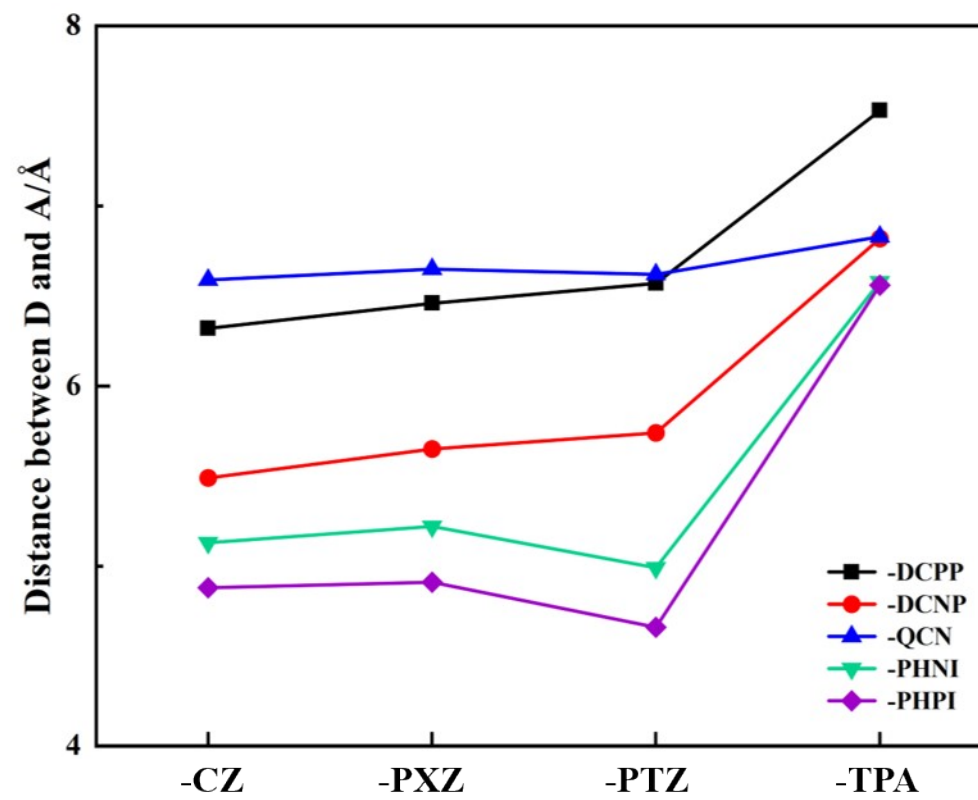

**Figure S4.** The Distance between D and A for all  $v$ -shaped molecules in Toluene.

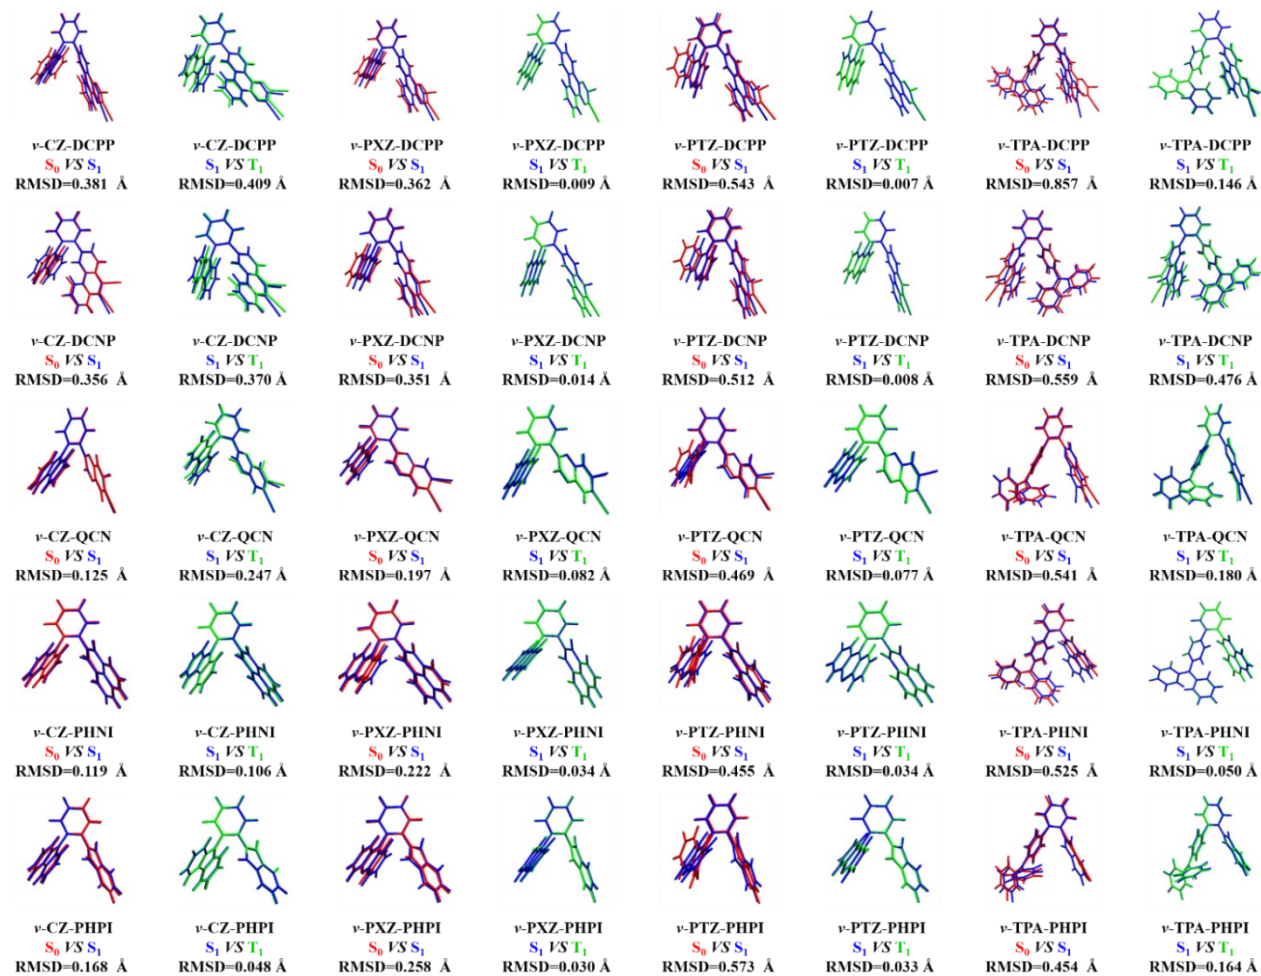

**Figure S5.** Geometry comparisons and RMSD values of all  $\nu$ -shaped molecules between  $S_0$  (red),  $S_1$  (blue), and  $T_1$  (green) in Toluene, respectively.



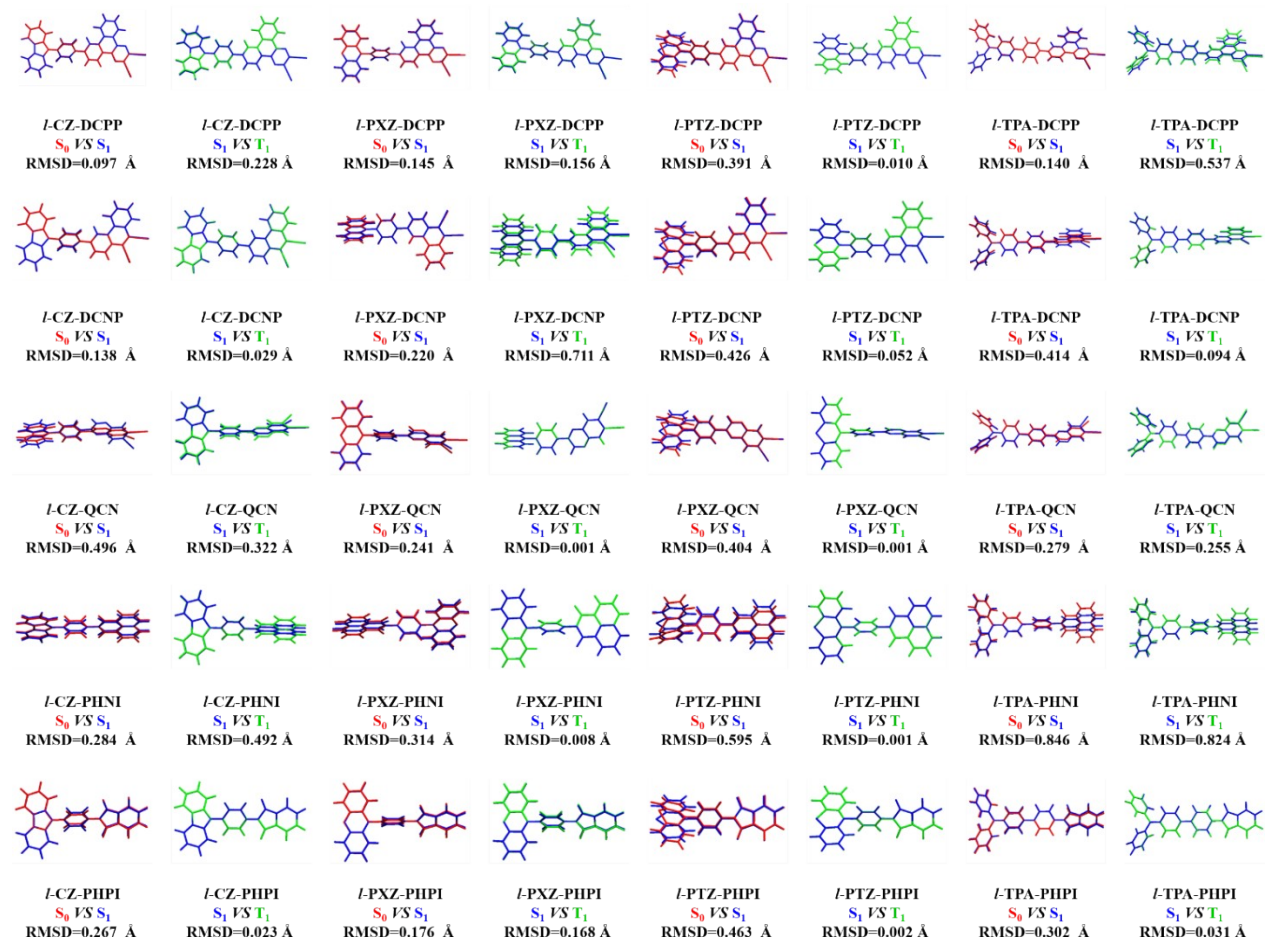

**Figure S6.** Geometry comparisons and RMSD values of all *l*-shaped molecules between  $S_0$  (red),  $S_1$  (blue), and  $T_1$  (green) in Toluene, respectively.



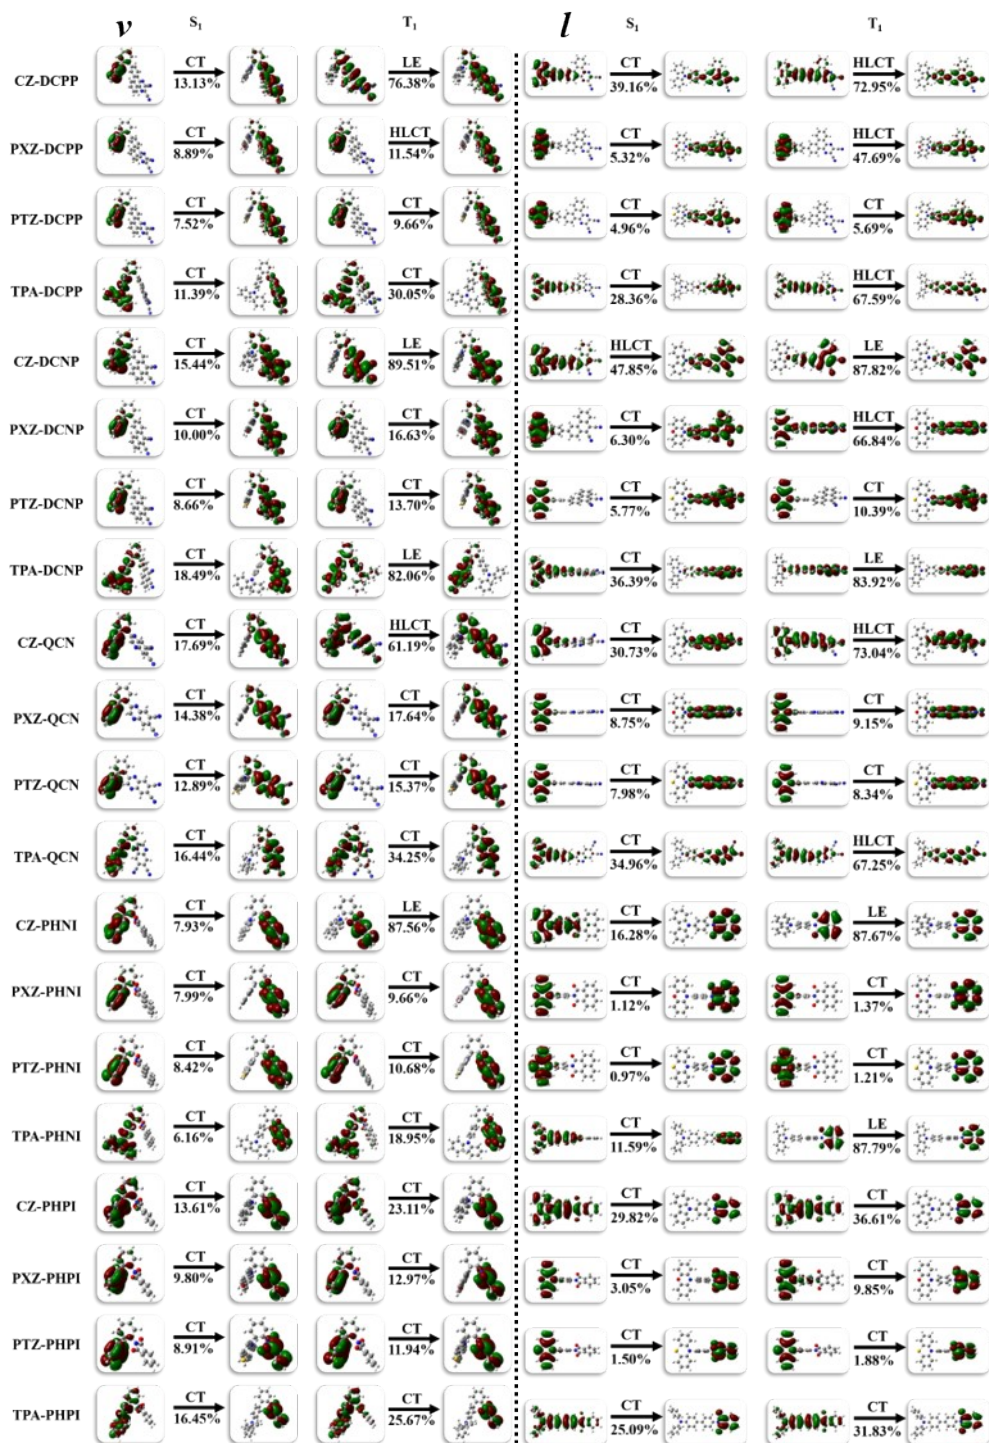

**Figure S7.** Natural transition orbitals (NTOs) of the  $S_1$  and  $T_1$  states for all  $\nu$ -shaped molecules and  $l$ -shaped molecules in Toluene, respectively.

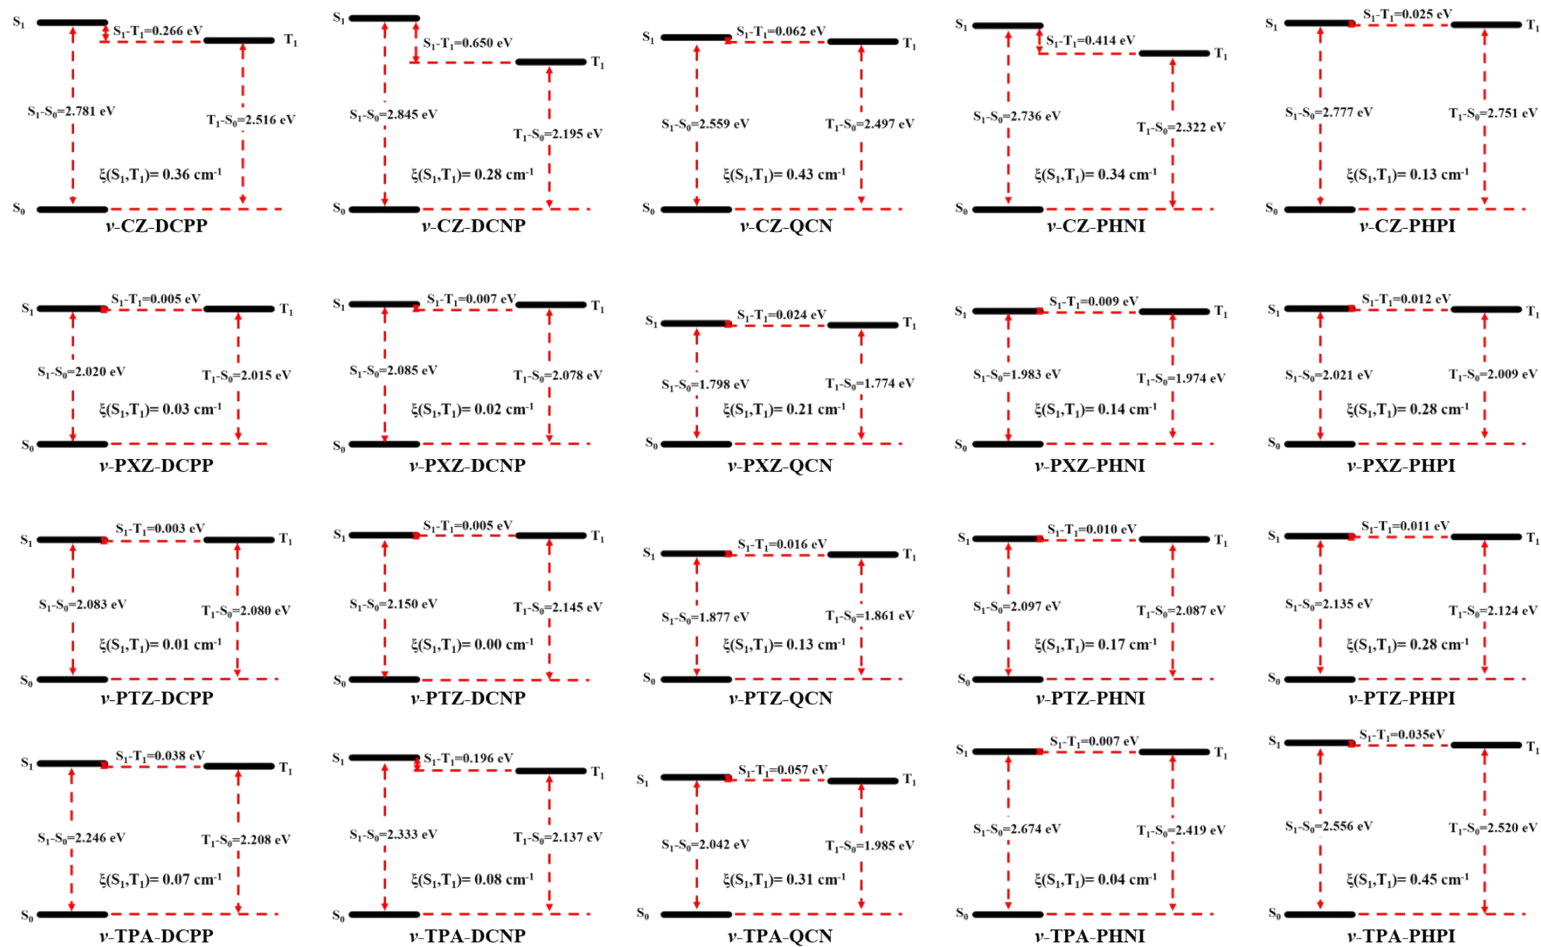

**Figure S8.** The energy levels of molecules of all  $\nu$ -shaped molecules in Toluene.

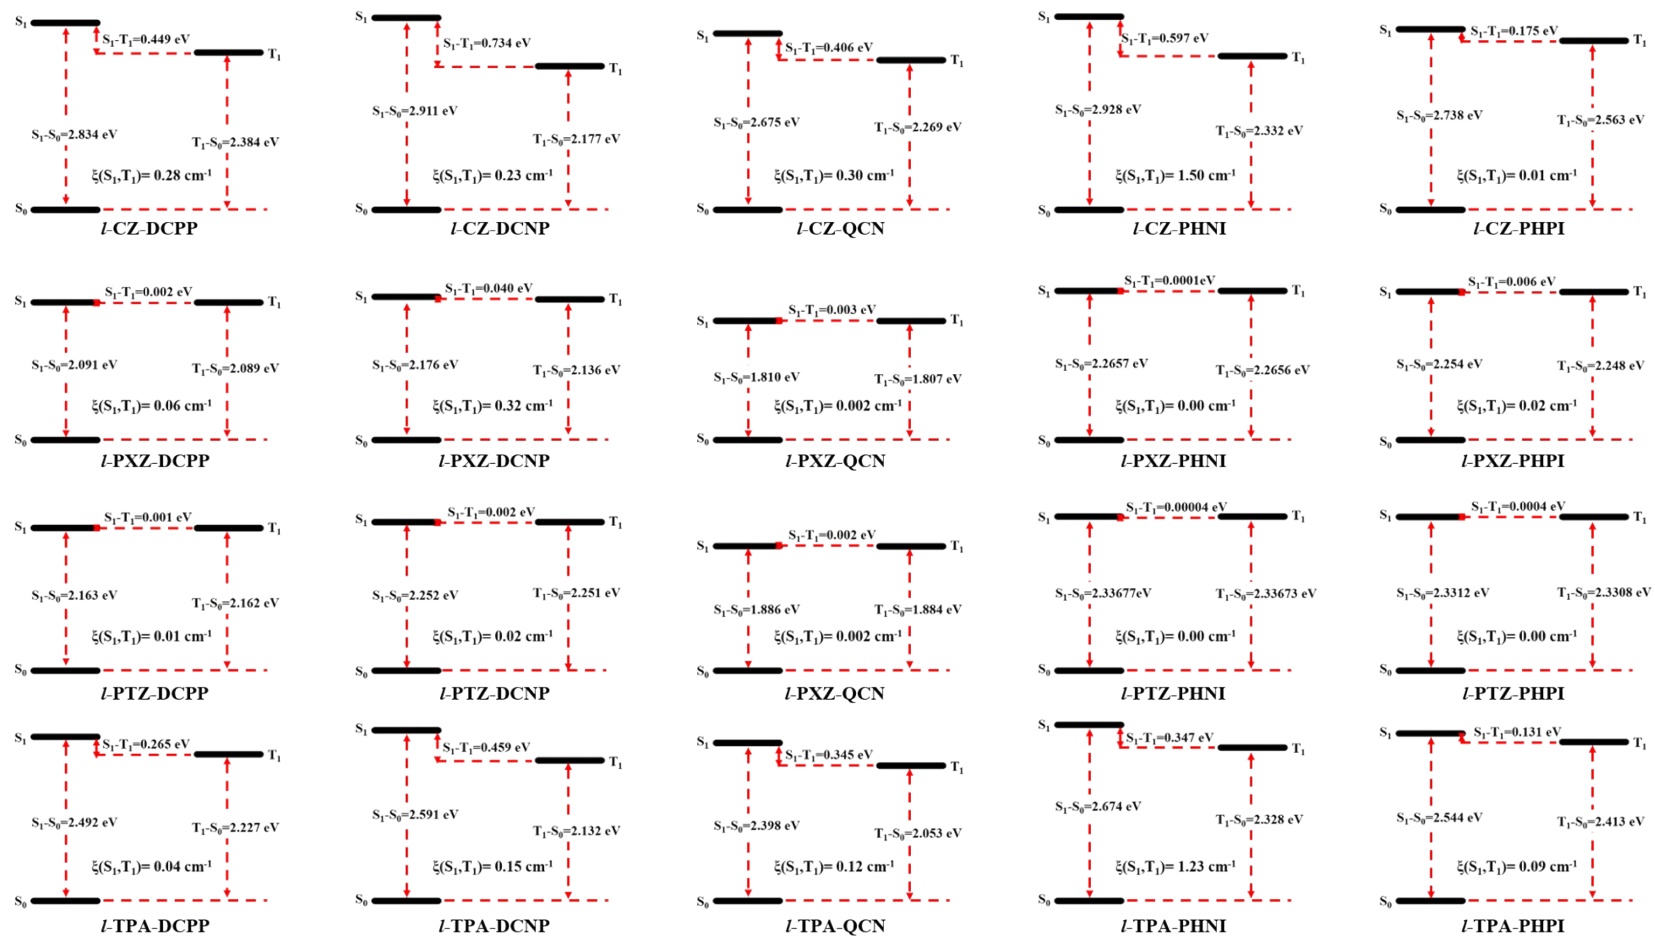

Figure S9. The energy levels of molecules of all *l*-shaped molecules in Toluene.

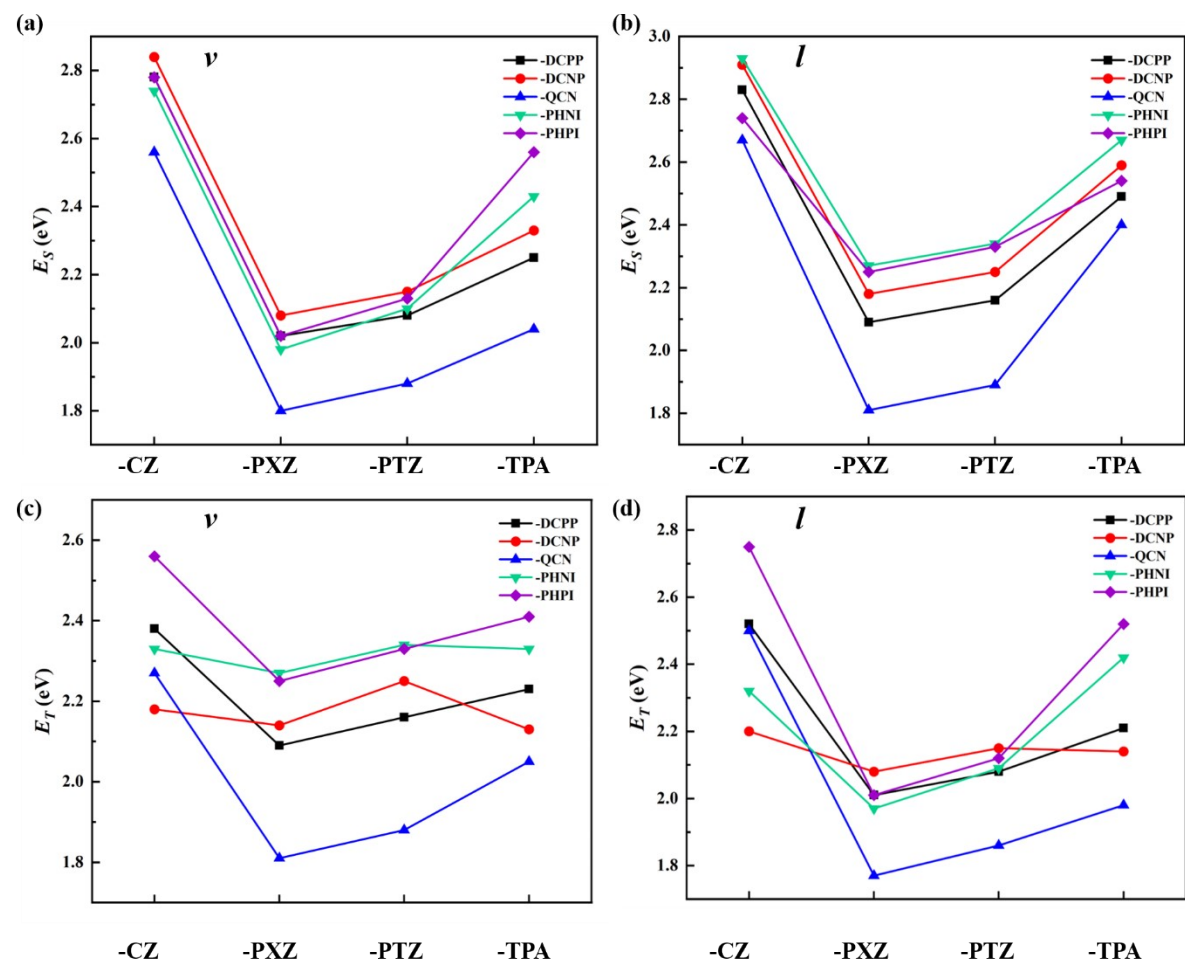

**Figure S10.** The  $S_1$ (a,b) and  $T_1$ (c,d) energies of all  $v$ -shaped molecules and  $l$ -shaped molecules in Toluene.

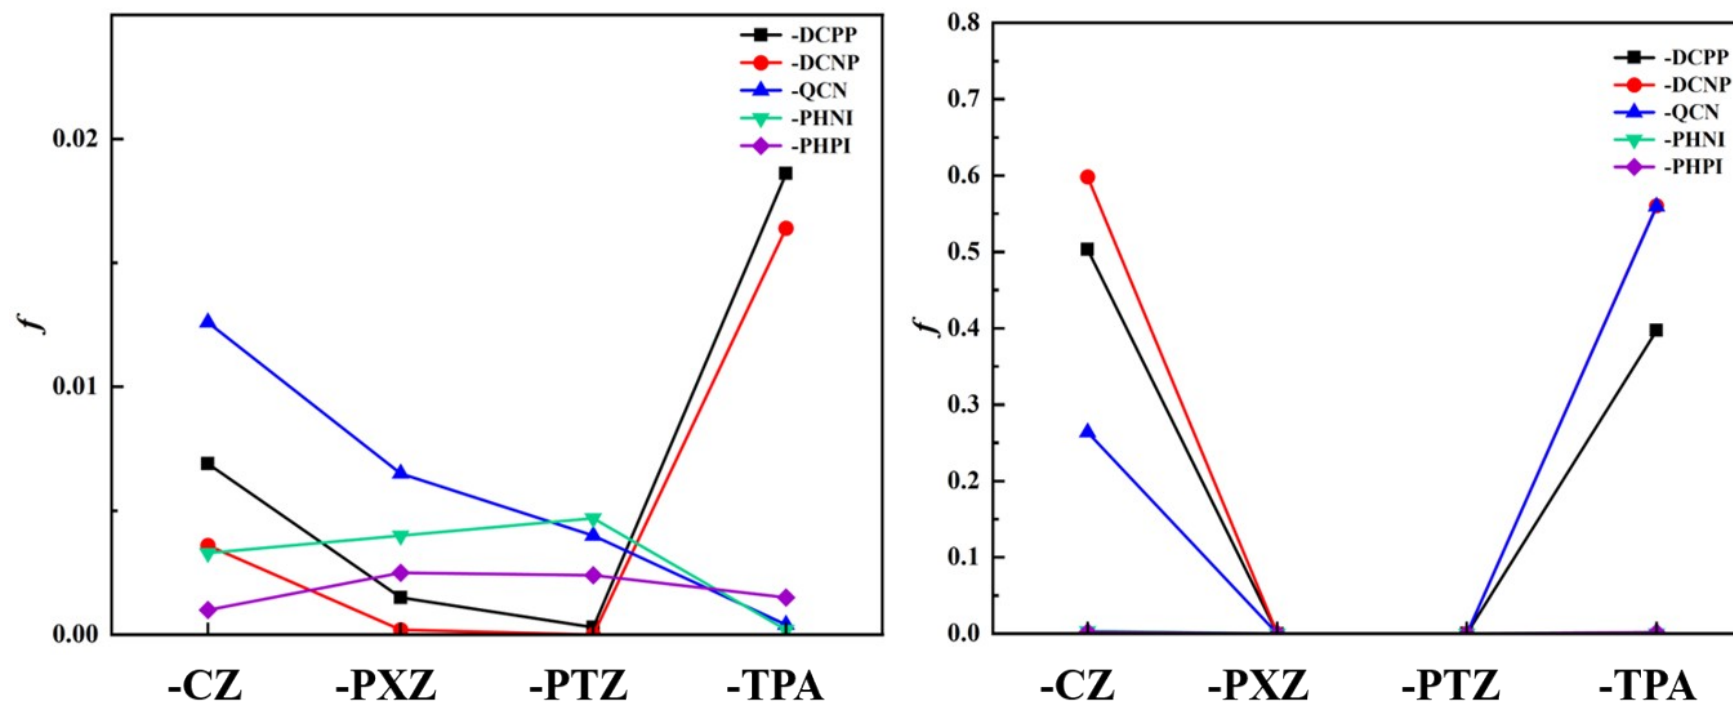

**Figure S11.** Oscillator strength ( $f$ ) from  $S_1$  to  $S_0$  for all  $v$ -shaped molecules and  $l$ -shaped molecules in Toluene, respectively.

**Table S1.** The emission wavelengths (nm) of  $\nu$ -CZ-PHNI and  $\nu$ -CZ-PHPI calculated by different functionals and experimentally measured emission wavelengths in toluene.

|        | b3lyp  | bmh    | m062x  | wb97xd | pbe0   | pbe33  | exp. |
|--------|--------|--------|--------|--------|--------|--------|------|
| CZPHNI | 646.04 | 471.69 | 427.72 | 414.55 | 581.05 | 503.56 | 517  |
| CZPHPI | 682.56 | 487.49 | 436.36 | 427.5  | 607.78 | 525.33 | 520  |

Table S2 Energy gap between  $S_1$  and  $T_1$  calculated with LC-WPBE with optimized  $w$  and PBE33.

|                  | $w$    | LC-WPBE ( $\Delta E_{ST}$ ) | Pbe33 ( $\Delta E_{ST}$ ) |
|------------------|--------|-----------------------------|---------------------------|
| $\nu$ -CZ-DCPP   | 0.1801 | 0.623                       | 0.266                     |
| $\nu$ -PXZ-DCPP  | 0.1797 | 0.016                       | 0.005                     |
| $\nu$ -PTZ-DCPP  | 0.1774 | 0.011                       | 0.003                     |
| $\nu$ -TPA-DCPP  | 0.1726 | 0.094                       | 0.038                     |
| $\nu$ -CZ-DCNP   | 0.1841 | 0.965                       | 0.650                     |
| $\nu$ -PXZ-DCNP  | 0.1830 | 0.025                       | 0.007                     |
| $\nu$ -PTZ-DCNP  | 0.1807 | 0.018                       | 0.005                     |
| $\nu$ -TPA-DCNP  | 0.1751 | 0.544                       | 0.196                     |
| $\nu$ -CZ-QCN    | 0.1843 | 0.154                       | 0.062                     |
| $\nu$ -PXZ- QCN  | 0.1843 | 0.033                       | 0.024                     |
| $\nu$ -PTZ- QCN  | 0.1828 | 0.025                       | 0.016                     |
| $\nu$ -TPA- QCN  | 0.1843 | 0.193                       | 0.057                     |
| $\nu$ -CZ-PHNI   | 0.1945 | 0.789                       | 0.414                     |
| $\nu$ -PXZ- PHNI | 0.1931 | 0.016                       | 0.009                     |
| $\nu$ -PTZ- PHNI | 0.1913 | 0.019                       | 0.010                     |
| $\nu$ -TPA- PHNI | 0.1848 | 0.253                       | 0.007                     |
| $\nu$ -CZ- PHPI  | 0.2024 | 0.084                       | 0.025                     |
| $\nu$ -PXZ- PHPI | 0.2014 | 0.02                        | 0.012                     |
| $\nu$ -PTZ- PHPI | 0.1994 | 0.019                       | 0.011                     |
| $\nu$ -TPA- PHPI | 0.1957 | 0.117                       | 0.035                     |

**Table S3.** Geometric parameters of all  $\nu$ -shaped molecules in toluene.

|                 | Dihedral angle/ $^{\circ}$ |       | Distance between      |
|-----------------|----------------------------|-------|-----------------------|
|                 | D-B                        | A-B   | D and A/ $\text{\AA}$ |
| $\nu$ -CZ-DCPP  | 73.57                      | 44.82 | 6.32                  |
| $\nu$ -PXZ-DCPP | 75.92                      | 47.60 | 6.46                  |
| $\nu$ -PTZ-DCPP | 74.84                      | 47.95 | 6.57                  |
| $\nu$ -TPA-DCPP | 47.71                      | 45.13 | 7.53                  |
| $\nu$ -CZ-DCNP  | 73.64                      | 44.58 | 5.49                  |
| $\nu$ -PXZ-DCNP | 76.29                      | 47.32 | 5.65                  |
| $\nu$ -PTZ-DCNP | 74.78                      | 47.54 | 5.74                  |
| $\nu$ -TPA-DCNP | 50.20                      | 46.55 | 6.82                  |
| $\nu$ -CZ-QCN   | 58.72                      | 37.65 | 6.59                  |
| $\nu$ -PXZ-QCN  | 64.93                      | 40.56 | 6.65                  |
| $\nu$ -PTZ-QCN  | 68.40                      | 40.27 | 6.62                  |
| $\nu$ -TPA-QCN  | 49.54                      | 43.48 | 6.83                  |
| $\nu$ -CZ-PHNI  | 73.98                      | 71.82 | 5.13                  |
| $\nu$ -PXZ-PHNI | 89.48                      | 75.35 | 5.22                  |
| $\nu$ -PTZ-PHNI | 86.49                      | 79.80 | 4.99                  |
| $\nu$ -TPA-PHNI | 56.19                      | 77.52 | 6.58                  |
| $\nu$ -CZ-PHPI  | 58.97                      | 59.45 | 4.88                  |
| $\nu$ -PXZ-PHPI | 62.30                      | 64.15 | 4.91                  |
| $\nu$ -PTZ-PHPI | 66.84                      | 67.58 | 4.66                  |
| $\nu$ -TPA-PHPI | 51.45                      | 70.75 | 6.56                  |



**Table S4.** Geometric parameters of all *l*-shaped molecules in toluene.

|                     | Dihedral angle/ $^{\circ}$ |       |
|---------------------|----------------------------|-------|
|                     | D-B                        | A-B   |
| <i>l</i> -CZ-DCPP   | 53.05                      | 37.21 |
| <i>l</i> -PXZ-DCPP  | 89.03                      | 38.36 |
| <i>l</i> -PTZ-DCPP  | 80.12                      | 38.41 |
| <i>l</i> -TPA-DCPP  | 35.27                      | 37.23 |
| <i>l</i> -CZ-DCNP   | 53.04                      | 37.34 |
| <i>l</i> -PXZ-DCNP  | 89.18                      | 38.57 |
| <i>l</i> -PTZ-DCNP  | 80.36                      | 38.42 |
| <i>l</i> -TPA-DCNP  | 35.65                      | 37.03 |
| <i>l</i> -CZ-QCN    | 50.25                      | 19.15 |
| <i>l</i> -PXZ- QCN  | 82.30                      | 21.71 |
| <i>l</i> -PTZ- QCN  | 80.37                      | 0.19  |
| <i>l</i> -TPA- QCN  | 34.01                      | 19.04 |
| <i>l</i> -CZ-PHNI   | 55.63                      | 70.21 |
| <i>l</i> -PXZ- PHNI | 89.42                      | 78.28 |
| <i>l</i> -PTZ- PHNI | 80.26                      | 86.02 |
| <i>l</i> -TPA- PHNI | 36.84                      | 78.13 |
| <i>l</i> -CZ- PHPI  | 54.50                      | 43.24 |
| <i>l</i> -PXZ- PHPI | 88.24                      | 42.47 |
| <i>l</i> -PTZ- PHPI | 80.81                      | 42.69 |
| <i>l</i> -TPA- PHPI | 35.68                      | 43.47 |

**Table S5.** Through space/bond CT transition densities between the donor and acceptor of all molecules based on optimized  $S_1$  structures.

| Molecule        | Through space CT |        | Through bond CT |        | Total Density |
|-----------------|------------------|--------|-----------------|--------|---------------|
|                 | Density          | Ratio  | Density         | Ratio  |               |
| $\nu$ -CZ-DCPP  | 0.109            | 78.55% | 0.030           | 21.44% | 0.138         |
| $\nu$ -PXZ-DCPP | 0.082            | 84.66% | 0.015           | 15.33% | 0.097         |
| $\nu$ -PTZ-DCPP | 0.071            | 85.67% | 0.012           | 14.32% | 0.083         |
| $\nu$ -TPA-DCPP | 0.155            | 93.42% | 0.011           | 6.57%  | 0.166         |
| $\nu$ -CZ-DCNP  | 0.130            | 76.95% | 0.039           | 23.04% | 0.169         |
| $\nu$ -PXZ-DCNP | 0.090            | 81.20% | 0.021           | 18.79% | 0.111         |
| $\nu$ -PTZ-DCNP | 0.081            | 83.33% | 0.016           | 16.66% | 0.097         |
| $\nu$ -TPA-DCNP | 0.188            | 88.07% | 0.025           | 11.92% | 0.213         |
| $\nu$ -CZ-QCN   | 0.173            | 78.79% | 0.047           | 21.20% | 0.220         |
| $\nu$ -PXZ- QCN | 0.154            | 84.83% | 0.028           | 15.16% | 0.182         |
| $\nu$ -PTZ- QCN | 0.138            | 85.91% | 0.023           | 14.08% | 0.161         |
| $\nu$ -TPA- QCN | 0.149            | 84.67% | 0.027           | 15.32% | 0.176         |

**Table S6.**  $\lambda_{em}$  (nm) is the emission wavelength of all *l*-shaped molecules,  $E_S$  is the adiabatic energy of S<sub>1</sub> state,  $E_T$  is the adiabatic energy of T<sub>1</sub> state, and  $\Delta E_{ST}$  is the adiabatic energy difference between S<sub>1</sub> state and T<sub>1</sub> state of the molecules,  $f$  is the vibration strength of the molecule in Toluene.

|                    | $\lambda$ (nm) | $E_S$<br>(eV) | $E_T$<br>(eV) | $\Delta E_{ST}$<br>(eV) | $f$    |
|--------------------|----------------|---------------|---------------|-------------------------|--------|
| <i>l</i> -CZ-DCPP  | 463.78         | 2.83          | 2.38          | 0.499                   | 0.5032 |
| <i>l</i> -PXZ-DCPP | 670.15         | 2.09          | 2.09          | 0.002                   | 0      |
| <i>l</i> -PTZ-DCPP | 679.22         | 2.16          | 2.16          | 0.001                   | 0.0002 |
| <i>l</i> -TPA-DCPP | 536.09         | 2.49          | 2.23          | 0.265                   | 0.397  |
| <i>l</i> -CZ-DCNP  | 451.73         | 2.91          | 2.18          | 0.734                   | 0.5984 |
| <i>l</i> -PXZ-DCNP | 635.35         | 2.18          | 2.14          | 0.040                   | 0      |
| <i>l</i> -PTZ-DCNP | 642.17         | 2.25          | 2.25          | 0.002                   | 0.0001 |
| <i>l</i> -TPA-DCNP | 511.40         | 2.59          | 2.13          | 0.459                   | 0.5606 |
| <i>l</i> -CZ-QCN   | 469.52         | 2.67          | 2.27          | 0.406                   | 0.2637 |
| <i>l</i> -PXZ-QCN  | 785.47         | 1.81          | 1.81          | 0.003                   | 0      |
| <i>l</i> -PTZ-QCN  | 793.84         | 1.89          | 1.88          | 0.002                   | 0      |
| <i>l</i> -TPA-QCN  | 551.50         | 2.40          | 2.05          | 0.345                   | 0.5597 |
| <i>l</i> -CZ-PHNI  | 481.83         | 2.93          | 2.33          | 0.597                   | 0.0033 |
| <i>l</i> -PXZ-PHNI | 628.68         | 2.27          | 2.27          | 0.0001                  | 0      |
| <i>l</i> -PTZ-PHNI | 633.35         | 2.34          | 2.34          | 0.00004                 | 0      |
| <i>l</i> -TPA-PHNI | 531.13         | 2.67          | 2.33          | 0.347                   | 0.0018 |
| <i>l</i> -CZ-PHPI  | 590.62         | 2.74          | 2.56          | 0.175                   | 0.0022 |
| <i>l</i> -PXZ-PHPI | 688.96         | 2.25          | 2.25          | 0.006                   | 0      |
| <i>l</i> -PTZ-PHPI | 694.87         | 2.33          | 2.33          | 0.0003                  | 0      |

|                |        |      |      |       |        |
|----------------|--------|------|------|-------|--------|
| PHPI           |        |      |      |       |        |
| <i>l</i> -TPA- | 639.02 | 2.54 | 2.41 | 0.131 | 0.0018 |
| PHPI           |        |      |      |       |        |

**Table S7.** Radiative and internal conversion rates from S<sub>1</sub> to S<sub>0</sub> as well as the ISC and RISC rates between S<sub>1</sub> and T<sub>1</sub> for all *l*-shaped molecules in Toluene.

|                    | $SOC_{T_1}(cm^{-1})$ | $k_{ISC}(s^{-1})$  | $k_{RISC}(s^{-1})$ | $k_r(s^{-1})$      | $k_{nr}(s^{-1})$   |
|--------------------|----------------------|--------------------|--------------------|--------------------|--------------------|
| <i>l</i> -CZ-DCPP  | 0.277                | $1.06 \times 10^7$ | 0                  | $1.56 \times 10^8$ | $1.35 \times 10^7$ |
| <i>l</i> -PXZ-DCPP | 0.064                | $5.16 \times 10^6$ | $6.49 \times 10^6$ | 0                  | $3.09 \times 10^5$ |
| <i>l</i> -PTZ-DCPP | 0.009                | $5.40 \times 10^5$ | $6.34 \times 10^5$ | $2.89 \times 10^4$ | $3.39 \times 10^5$ |
| <i>l</i> -TPA-DCPP | 0.038                | $4.23 \times 10^3$ | 0                  | $9.21 \times 10^7$ | $9.19 \times 10^6$ |
| <i>l</i> -CZ-DCNP  | 0.235                | $3.04 \times 10^5$ | 0                  | $1.96 \times 10^8$ | $1.22 \times 10^7$ |
| <i>l</i> -PXZ-DCNP | 0.321                | $3.44 \times 10^3$ | $2.83 \times 10^3$ | 0                  | $3.84 \times 10^5$ |
| <i>l</i> -PTZ-DCNP | 0.018                | $1.33 \times 10^6$ | $1.12 \times 10^6$ | $1.62 \times 10^4$ | $4.71 \times 10^5$ |
| <i>l</i> -TPA-DCNP | 0.149                | $3.17 \times 10^6$ | $1.34 \times 10^0$ | $1.43 \times 10^8$ | $9.59 \times 10^6$ |
| <i>l</i> -CZ-QCN   | 0.299                | $1.02 \times 10^7$ | 0                  | $7.14 \times 10^7$ | $2.50 \times 10^7$ |
| <i>l</i> -PXZ-QCN  | 0.002                | $6.20 \times 10^3$ | $2.05 \times 10^4$ | 0                  | $3.33 \times 10^6$ |
| <i>l</i> -PTZ-QCN  | 0.002                | $9.67 \times 10^3$ | $1.51 \times 10^4$ | 0                  | $1.19 \times 10^6$ |

---

|                    |       |                    |                    |                    |                    |
|--------------------|-------|--------------------|--------------------|--------------------|--------------------|
| QCN                |       |                    |                    |                    |                    |
| <i>l</i> -TPA-QCN  | 0.115 | $6.18 \times 10^5$ | $1.42 \times 10^0$ | $1.23 \times 10^8$ | $2.08 \times 10^7$ |
| <i>l</i> -CZ-PHNI  | 1.499 | $7.39 \times 10^7$ | 0                  | $9.48 \times 10^5$ | $1.21 \times 10^6$ |
| <i>l</i> -PXZ-PHNI | 0     | 0                  | 0                  | 0                  | $1.17 \times 10^4$ |
| <i>l</i> -PTZ-PHNI | 0     | 0                  | 0                  | 0                  | $9.59 \times 10^3$ |
| <i>l</i> -TPA-PHNI | 1.232 | $5.31 \times 10^4$ | 0                  | $4.26 \times 10^5$ | $4.21 \times 10^5$ |
| <i>l</i> -CZ-PHPI  | 0.009 | $2.05 \times 10^3$ | $1.68 \times 10^1$ | $4.21 \times 10^5$ | $6.50 \times 10^6$ |
| <i>l</i> -PXZ-PHPI | 0.020 | $3.10 \times 10^5$ | $1.84 \times 10^5$ | 0                  | $4.29 \times 10^4$ |
| <i>l</i> -PTZ-PHPI | 0     | 0                  | 0                  | 0                  | $3.67 \times 10^4$ |
| <i>l</i> -TPA-PHPI | 0.092 | $1.61 \times 10^6$ | $2.30 \times 10^4$ | $2.94 \times 10^5$ | $4.14 \times 10^6$ |

---
